# Supplementary material for: Thermo-responsiveness and biocompatibility of star-shaped poly[2-(dimethylamino)ethyl methacrylate]-b-poly(sulfobetaine methacrylate) grafted on a β-cyclodextrin core
Source: Royal Society of Chemistry journal article supplement (doi:10.1039/c5ra02115d), 2015-01-01
Supplement: c5ra02115d1.pdf [file c5ra02115d1.pdf]

† Electronic Supplementary Information (ESI) available:

**Thermo-responsiveness and biocompatibility of star-shaped poly[2-(dimethylamino)ethyl methacrylate]-*b*-poly(sulfobetaine methacrylate) grafted on  $\beta$ -cyclodextrin core**

Mingming Zhang,<sup>\*a, ‡</sup> Wei Shen,<sup>a, ‡</sup> Qingqing Xiong,<sup>b</sup> Hongwei Wang,<sup>a,c</sup> Zhimin Zhou,<sup>a</sup>  
Wenjuan Chen,<sup>a</sup> Qiqing Zhang<sup>\*a,d</sup>

<sup>a</sup> Tianjin Key Laboratory of Biomedical Materials, Institute of Biomedical Engineering, Chinese Academy of Medical Sciences & Peking Union Medical College, Tianjin 300192, P. R. China.

<sup>b</sup> Department of Hepatobiliary Surgery, Tianjin Medical University Cancer Institute and Hospital, National Clinical Research Center for Cancer, Key Laboratory of Cancer Prevention and Therapy, Tianjin 300060, P. R. China

<sup>c</sup> Institute of Chinese Materia Medica, Chengde Medical University, Hebei Key Laboratory of Research and Development for Traditional Chinese Medicine, Chengde, Hebei 067000, P. R. China

<sup>d</sup> Institute of Biomedical and Pharmaceutical Technology, Fuzhou University, Fuzhou 350002, P. R. China.

\* Corresponding author. E-mail: mingmingz@gmail.com (M. Zhang),  
zhangqiq@126.com (Q. Zhang). Phone/Fax: +86-22-87890868.

‡ These authors contributed equally to this work.

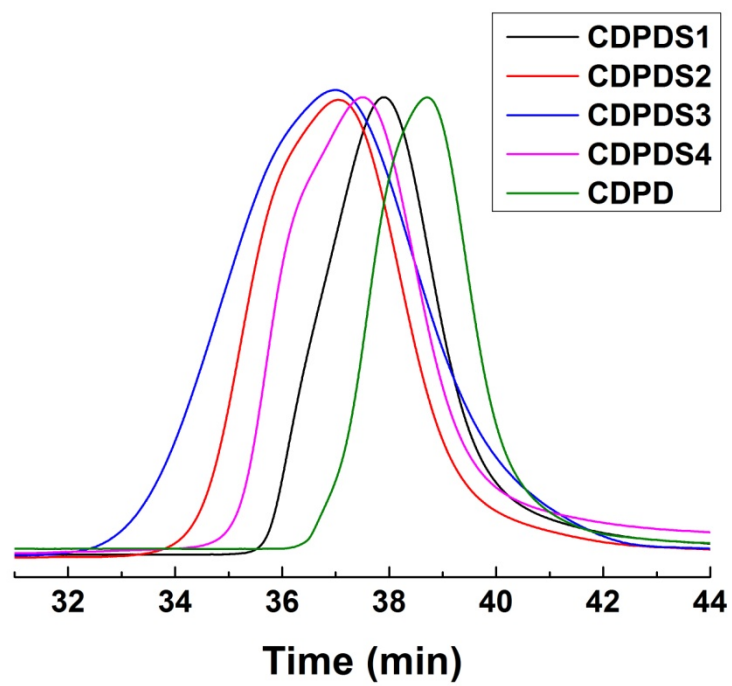

**Fig. S1†** GPC traces of CDPDS and CDPD star polymers.
